# Supplementary material for: Exploiting Na2MnPO4F as a high-capacity and well-reversible cathode material for Na-ion batteries
Source: Royal Society of Chemistry journal article supplement (doi:10.1039/c4ra05336b), 2014-07-31
Supplement: c4ra05336b1.pdf [file c4ra05336b1.pdf]

# Exploiting $\text{Na}_2\text{MnPO}_4\text{F}$ as a high-capacity and well-reversible cathode material for Na-ion batteries

Xiaochen Lin, Xu Hou, Xiaobiao Wu, Sihui Wang, Ming Gao, Yong Yang\*

State Key Laboratory of Physical Chemistry of Solid Surfaces, and Department of Chemistry, College of Chemistry and Chemical Engineering, Xiamen University, Xiamen 361005, PR China. E-mail: [yyang@xmu.edu.cn](mailto:yyang@xmu.edu.cn)

## 1. The *ex-situ* XPS measurements

Mn 3s level is known to exhibit multiplet splitting ( $\Delta E_{3s}$ ), which is an indicator for the Mn valence<sup>1-4</sup>. Therefore, we utilize the *ex-situ* XPS measurements of Mn 3s to prove the existence of  $\text{Mn}^{2+}$  and study the variation trend of Mn valence during cycling.

The *ex-situ* XPS spectra and multiplet splitting in different charge/discharge states are shown in Fig. S1 and Table. S1.

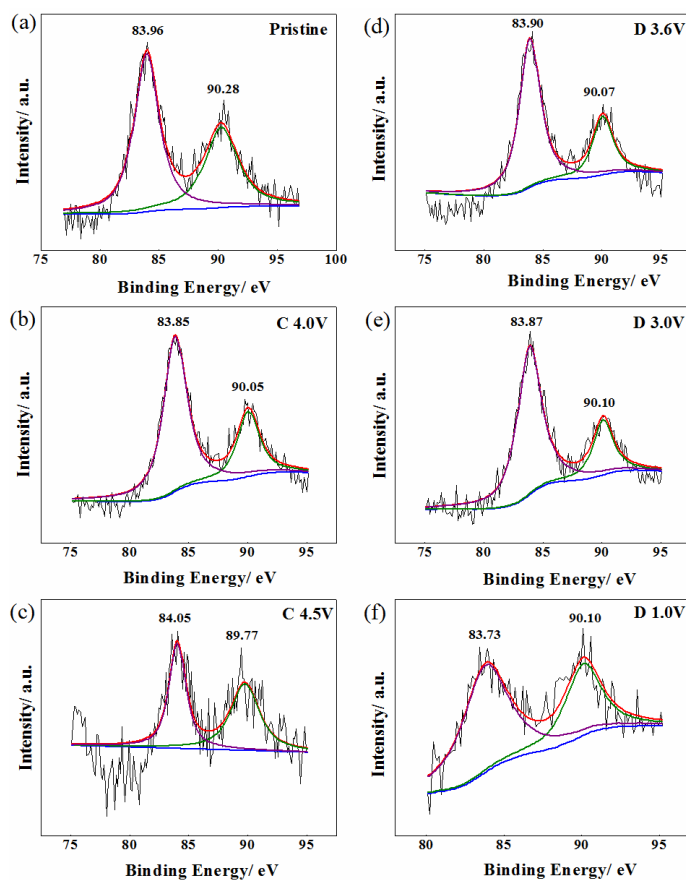

Fig. S1 *Ex-situ* XPS spectra of different charge/discharge states: (a) pristine; (b) charge to 4.0 V; (c) charge to 4.5 V; (d) discharge to 3.6 V; (e) discharge to 3.0 V; (f) discharge to 1.0 V.

Table. S1 The multiplet splitting of Mn 3s at different charge/discharge states in XPS

| States   | $\Delta E_{3s}$ /eV |
|----------|---------------------|
| Pristine | 6.32                |
| C 4.0V   | 6.10                |
| C 4.5V   | 5.72                |
| D 3.6V   | 6.17                |
| D 3.0V   | 6.23                |
| D 1.0V   | 6.37                |

The  $\Delta E_{3s}$  of pristine sample is 6.32 eV, which is between the reported  $\Delta E_{3s}$  values of  $Mn^{2+}$  in sulphides (6.2 eV)<sup>4</sup> and spinel material (6.5 eV)<sup>1-3</sup>. Owing to few reports about XPS of Mn 3s in polyanionic cathode material, we can roughly confirm the existence of divalent Mn in  $Na_2MnPO_4F$  material.

The *ex-situ* XPS results also show that  $\Delta E_{3s}$  decrease from 6.32 eV to 5.72 eV when charged to 4.5V, corresponding to the change of Mn valence from  $Mn^{2+}$  to  $Mn^{3+}$ . Then in the discharge process, the trend is opposite as the Mn valence turns back to  $Mn^{2+}$ . Therefore, the changes of Mn valence during cycling can be qualitatively studied through *ex-situ* XPS.

## 2. The calculation of $Na^+$ diffusion coefficient

The below formula we used to calculate  $Na^+$  diffusion coefficient is one simplified formula. It applies to planar diffusion in a slab of homogeneous material with a linear dependency of  $E-t^{1/2}$  and good equilibration during the relaxation period. According to equation (1) derived from Sand equation<sup>5</sup>, we can calculate the apparent chemical diffusion coefficient value.

$$\frac{dE}{dt^{1/2}} = \frac{2j}{C_V(\pi D)^{1/2}} \quad (1)$$

$$\frac{\Delta E_P}{\tau^{1/2}} = \frac{2I}{AC_V(\pi D)^{1/2}} \quad \Delta E_P = \frac{2I\tau^{1/2}}{AC_V(\pi D)^{1/2}}$$

$$\Delta E_R = \frac{\Delta Q}{C} = \frac{\Delta Q}{VC_V} = \frac{I\tau}{VC_V}$$

$$\frac{\Delta E_R}{\Delta E_P} = \frac{\tau^{1/2}(\pi D)^{1/2} A}{2V} = \frac{\tau^{1/2}(\pi D)^{1/2}}{2L}$$

$$D = \left( \frac{4}{\pi} \right) \left( \frac{L^2}{\tau_P} \right) \left( \frac{\Delta E_{RELAX}}{\Delta E_{PULSE}} \right)^2$$

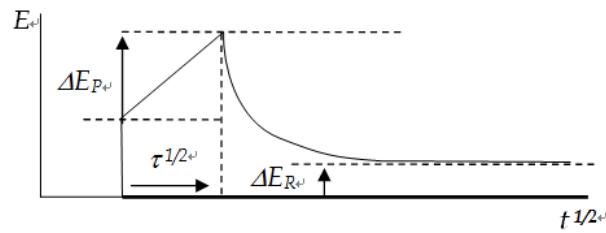

Where  $L$  is the ratio of active material volume to the surface area perpendicular to the current ( $L=10^{-5}$  cm observed from the SEM images), and  $\tau_P$  is the pulse duration ( $\tau_P=1800$  s). Combined the  $\Delta E_{PULSE}$  values obtained from  $E-t^{1/2}$  plots with the  $\Delta E_{RELAX}$  values obtained from  $E-t$  plots, we could calculate the simplified  $Na^+$  diffusion coefficient.

## References

- 1 D. A. Shirley, *Phys. Scr.*, 1975, **11**, 117.
- 2 V. A. M. Brabers, F. M. van Setten and P. S. A. Knapen, *J. Solid State Chem.*, 1983, **49**, 93-98.
- 3 G. C. Allen, S. J. Harris, J. A. Jutson and J. M. Dyke, *Appl. Surf. Sci.*, 1989, **37**, 111-134.
- 4 V. Tsurkan, M. Demeter, B. Schneider, D. Hartmann and M. Neumann, *Solid State Commun.*, 2000, **114**, 149-154.
- 5 A. J. Bard and L. R. Faulkner, *Electrochemical Methods*, 2nd Edition edn., 2001.
